# Supplementary material for: Classification of masked image data
Source: PLOS journal article supplement (doi:10.1371/journal.pone.0254181), 2021-07-06
Supplement: S11 (10.1371/journal.pone.0254181.s011) [file journal.pone.0254181.s011]

S4 Table. Categorical discriminator.

| Discriminator   | Act.   | Output shape |
|-----------------|--------|--------------|
| Latent vector   | –      | 20x1x1       |
| Fully-connected | ELU    | 1000x1x1     |
| Fully-connected | ELU    | 1000x1x1     |
| Fully-connected | linear | 1x1x1        |
